# Supplementary material for: Induced in vivo transdifferentiation of vertebrate muscle into early endoderm-like cells
Source: Research Square preprint supplement (doi:10.21203/rs.3.rs-90546/v1), 2020-10-26
Supplement: Supplementary file 1 [file 19faadcd69071650a0f0bfd9.docx]

**Supplement Figure 7:** **A time course of endoderm gene induction in reprogrammed muscle cells.**

**(A-F)** Whole mount *in situ hybridization* of 28hpf **(left column)**, 48hpf **(middle column)** and 72hpf zebrafish embryos **(right column)** injected with either the muscle specific control construct *mylpfa:mCherry* **(control; A, C, E)** or *mylpfa:Oct4-P2A-mCherry-P2A-sox32* **(B, D, F)**. Compared to mylpfa:mCherry controls **(A)**, ectopic *sox17* expression (purple)can be detected within the myotomes at 28hpf, but is not detected at 48hpf or 72hpf **(arrows; B)**. **(C-D)** Embryos were probed for ectopic *foxa2* expression (purple) which is not detected outside its endogenous domain in control samples **(C)** but is detected in the trunk region at 28hpf, 48hpf and 72hpf following coexpression of Oct4 and sox32. **(E-F)** In mylpfa:mCherry injected controls, *cdx 4* expression(purple)is never detected outside its endogenous domain **(E)** but in experimental embryos, ectopic *cdx4* expression can be observed within the myotomes at 48hpf but it is not detected at 28hpf or 72hpf.
