# Supplementary material for: Induced in vivo transdifferentiation of vertebrate muscle into early endoderm-like cells
Source: Research Square preprint supplement (doi:10.21203/rs.3.rs-90546/v1), 2020-10-26
Supplement: Supplementary file 1 [file 8085cf28ded2b91de3739024.pdf]

Table 1

| Primary Antibody                                                                                                                                                                                                                                      |                 | Company                              | Part#        | Concentration |            |        |
|-------------------------------------------------------------------------------------------------------------------------------------------------------------------------------------------------------------------------------------------------------|-----------------|--------------------------------------|--------------|---------------|------------|--------|
| GFP                                                                                                                                                                                                                                                   | Anti-Chicken    | Aves Labs                            | GFP-1020     | 1:300         | Chicken    |        |
| Insulin                                                                                                                                                                                                                                               | Anti-Guinea Pig | biomeda                              | V2024        | 1:200         | Guinea Pig |        |
| mCherry                                                                                                                                                                                                                                               | Anti-Rabbit     | Rockland                             | 600-401-P16S | 1:200         | Rabbit     |        |
| Myosin Heavy Chain (F-59)*                                                                                                                                                                                                                            | Anti-Mouse      | Developmental Studies Hybridoma Bank | F-59         | 1:20          | Mouse      |        |
| myosin light chain 1 and 3f (LC11/3f: F310)*                                                                                                                                                                                                          | Anti-Mouse      | Developmental Studies Hybridoma Bank | F310         | 1:20          | Mouse      |        |
| Hu/C/D (Elavl3/4)                                                                                                                                                                                                                                     | Anti-Rabbit     | abcam                                | ab210554     | 1:100-1:500   | Rabbit     |        |
| Tp63                                                                                                                                                                                                                                                  | Anti-Rabbit     | GeneTex                              | GTX124660    | 1:200         | Rabbit     |        |
| *The monoclonal antibodies F59 and F310 developed by F.E. Stickdale was obtained from the Developmental Studies Hybridoma Bank, created by the NICHD of the NIH and maintained at The University of Iowa, Department of Biology, Iowa City, IA 52242. |                 |                                      |              |               |            |        |
| Secondary Antibody/Stains                                                                                                                                                                                                                             |                 |                                      |              |               |            |        |
| AlexaFluor 488                                                                                                                                                                                                                                        | Anti-Chicken    | Jackson ImmunoResearch               | 703-545-155  |               |            | Donkey |
| DyLight 405                                                                                                                                                                                                                                           | Anti-Guinea Pig | Jackson ImmunoResearch               | 706-475-148  | 1:200         |            | Donkey |
| AlexaFluor 647                                                                                                                                                                                                                                        | Anti-Mouse      | Invitrogen                           |              | 1:200         |            | Donkey |
| AlexaFluor 594                                                                                                                                                                                                                                        | Anti-Rabbit     | Invitrogen                           |              | 1:200         |            | Goat   |
| AlexaFluor 594                                                                                                                                                                                                                                        | Anti-Rabbit     | Invitrogen                           |              | 1:200         |            | Goat   |
| AlexaFluor 568                                                                                                                                                                                                                                        | Anti-Rabbit     | Invitrogen                           |              | 1:200         |            | Donkey |
| AlexaFluor 594                                                                                                                                                                                                                                        | Anti-Chick      | Invitrogen                           |              | 1:200         |            | Donkey |
| DAPI (500mg/ml)                                                                                                                                                                                                                                       |                 | Invitrogen                           |              | 1:200         |            |        |
|                                                                                                                                                                                                                                                       |                 |                                      |              |               |            |        |
