# Supplementary material for: Induced in vivo transdifferentiation of vertebrate muscle into early endoderm-like cells
Source: Research Square preprint supplement (doi:10.21203/rs.3.rs-90546/v1), 2020-10-26
Supplement: Supplementary file 3 [file 7ae58808eaca64e29729fe5d.docx]

**Supplemental Figure 1: Co-expression of Oct4 and Sox32 does not induce vascular or neural genetic programs.**

**(A-F’)** Z-focal plane of 48hpf zebrafish showing that cells co-expressing Oct4 (red membrane)and sox32 (red nuclei) do not up regulate detectable levels of vascular markers *kdrl:GFP* **(green A-B’)** or *fli1:GFP* **(green C-D’)** outside of their endogenous expression domains. **(E-F’)** Moreover, co-expression of Oct4 and sox32 do not upregulate the early neural differentiation marker *elavl3:GFP.* Together, these data suggest that, following co-expression of Oct4 and sox32, muscle cells primarily up-regulate factors required for endoderm development.
