# Supplementary material for: Induced in vivo transdifferentiation of vertebrate muscle into early endoderm-like cells
Source: Research Square preprint supplement (doi:10.21203/rs.3.rs-90546/v1), 2020-10-26
Supplement: Supplementary file 4 [file 8c46b3ed967bc8bf44a8681f.docx]

**Supplement Movie 1:** **Oct4 and sox32 are sufficient to induce sox17:GFP in living zebrafish.**

**(A, B)** Live imaging of *in vivo* reprogramming using light sheet confocal microscopy from 48hpf-64hpf. **(A)** Movie showing trunk of zebrafish embryo that was injected at the 1-cell stage with *hsp:Oct4-P2A-mCherry-P2A-sox32* **(red)**. During this window, some cells have already up regulated sox17:GFP**(green)** whereas others are just beginning **(arrows, Cell#1 and Cell#2)**. Cell#1 and Cell#2 also undergo dramatic morphological changes. **(B)** In contrast, sox17:GFP is never detected outside its endogenous domain (endoderm, blood vessel endothelial cells) in zebrafish embryos injected at the 1-cell stage with *hsp:mCherry* **(red)**.Morphological changes in cells expressing mCherry are minimal compared to experimental cells expressing Oct4 and sox32.
