# Supplementary material for: Induced in vivo transdifferentiation of vertebrate muscle into early endoderm-like cells
Source: Research Square preprint supplement (doi:10.21203/rs.3.rs-90546/v1), 2020-10-26
Supplement: Supplementary file 4 [file a07b4c939a7e3354060a788f.docx]

**Supplement Movie 4: A reprogrammed cell upregualtes sox17:GFP and produces long cellular extensions.**

Higher magnification of Supplement Movie 1, focusing on a cell from the head region with individual color tracks split out. During this 16 hour window, this cell expressing *Oct4-P2A-mCherry-sox32* (**red**) gradually upregulates *sox17:GFP* (**green**). Over this time frame, the cell loses mCherry expression and produces numerous extensions that dynamically expand and retract as the whole cell morphology changes.
