# Supplementary material for: Induced in vivo transdifferentiation of vertebrate muscle into early endoderm-like cells
Source: Research Square preprint supplement (doi:10.21203/rs.3.rs-90546/v1), 2020-10-26
Supplement: Supplementary file 5 [file f0b091a08e459808e81997f5.docx]

**Supplement Figure 3: scRNA-Seq analysis of Oct4-sox32 reprogramming in 50hpf zebrafish larvae**

(A) Diagram of polysitronic expression construct used for scRNA-Seq experimental workflow (Bottom). (B) UMAP plots showing germ layer labelled cell clusters used in scRNA-Seq analysis. (C) Bar graph displaying the percentage of germ layer labelled cells from experimental (+O4/H2BmCerry/s32) and control (+H2BmCherry) groups. There are more endoderm labelled cells in the experimental group compared to the control (Fisher’s exact test, p<3.34e-6), less ectoderm and more mesoderm. (E) UMAP plot showing cell/tissue type labelled clusters used in analysis. (E) Chart showing ODDs ratios and Fisher’s exact test comparing the number of control and experimental cells expressing any of the selected endoderm associated factors within each of 9 merged cell clusters. (F) UMAP plots showing cells expressing endoderm factors foxi1 (Top) and fabp1b.1 (Bottom) in control (H2BmCherry) and experimental (O4/mC/s32) cell groups. Two-sided Fisher’s exact test: foxi1; BH Adjusted Fisher’s exact p<0.01: fabp1b.1 BH Adjusted Fisher’s exact p<0.002.
