# Supplementary material for: Induced in vivo transdifferentiation of vertebrate muscle into early endoderm-like cells
Source: Research Square preprint supplement (doi:10.21203/rs.3.rs-90546/v1), 2020-10-26
Supplement: Supplementary file 6 [file f6d1359927916f5d91e87a0b.docx]

**Supplement Movie 3: A reprogrammed cell splits and one half upregualtes sox17:GFP.**

Higher magnification of Supplement Movie 1, focusing exclusively on Cell#1 (which is the same cell in Figure 1J), with individual color tracks split out. During this 16 hour window, this cell expressing *Oct4-P2A-mCherry-sox32* (**red**) gradually upregulates *sox17:GFP* (**green**). Over this time frame, mCherry (red) is lost and the cell morphology changes dramatically, producing extensions and apparently beginning to split in two.
