# Supplementary material for: Induced in vivo transdifferentiation of vertebrate muscle into early endoderm-like cells
Source: Research Square preprint supplement (doi:10.21203/rs.3.rs-90546/v1), 2020-10-26
Supplement: Supplementary file 7 [file c9498381afd2381376a862b3.docx]

**Supplement Figure 6**: **Loss of *myh7* and Myosin in reprogramed muscle cells.**

**(A-B”)** 3D rendering of representative 48hpf zebrafish with flourescent *whole mount* *in situ hybridization* and immunohistochemistry to detect *myosin heavy chain 7* mRNA **(*myh7*; red)** and sox17:GFP **(green)** in myocytes from *hsp:Oct4-P2A-mCherry-P2A-sox32* injected embryos.Arrows highlight muscle cells that have up regulated sox17:GFP **(green)** and subsequently down-regulated *myh7* **(red; n=11/13 reprogrammed cells (3 independent samples) )**. Also note that nuclei in reprogrammed myocytes appear to aggregate and are no longer regularly positioned along the horizontal axis as they are in neighboring, unaffected myocytes. **(C-F”)** 3D rendering of 72hpf zebrafish with Myosin stained myocytes **(blue)** injected withvarious Oct4 and sox32 expression constructs. **(C-C”)**Example of a single myocte coexpressingmCherryCAAX-P2A-Oct4 andH2B::mCherry-P2A-sox32 with induced foxa3:GFP**(green) (C, C’; arrow)** that has also lost expression of myosin **(blue; C”; arow)**.  **(D-D”)** The muscle specific construct *mylpfa:Oct4-P2A-mCherry-P2A-sox32* was used to reprogram muscle cells **(D, arrows, red)**, resulting in upregualtion of foxa3:GFP **(D’, arrow; green)** and loss of myosin **(D”, arrows; blue)**.Not all reprogrammed muscle cells that up regulate foxa3:GFPin the same animal lose myosin (D-D”; asteriks). (Note: This image is the same as that used in Figure 2F, F’.) **(E-E”)** *hsp:Oct4-P2A-mCherry-P2A-sox32* was used to reprogram muslce cells in *ptf1a:GFP* transgenic zebrafish. *ptf1a:GFP* **(green; E, E’, double arrows)** is induced in a myocte that has also lost expression of myosin **(E”, blue; double arrow). (F-F”)** Myoctes reprogrammed with the pluripotent defective Oct4(L80A) mutant and sox32 up regulate ptf1a:GFP **(green; F, F’, arrows)** andcan also lose Myosin **(blue; F”, arrows).** (Note: This image is the same image used in Figure 4D-D”).
