# Supplementary material for: Induced in vivo transdifferentiation of vertebrate muscle into early endoderm-like cells
Source: Research Square preprint supplement (doi:10.21203/rs.3.rs-90546/v1), 2020-10-26
Supplement: Supplementary file 8 [file d773ab2ed910544a1ce026c8.docx]

**Supplement Figure 4:** **Nuclei aggregation in reprogrammed muscle cells.**

**(A, Top**) Diagram depicting nuclei **(blue, nuceolus-white)** position in normal 54 hpf zebrafish muscle cells **(pink)** and in reprogrammed muscle cells **(red). (A, Bottom**) Representative confocal Z-stack images of 54hpf zebrafish muscle cells expressing mCherry alone (red; left-control) or Oct4-mCherry-sox32 **(red; middle, right**) with DAPI stained nuclei **(blue).** The nuclei in control muscle cells **(left; *hsp:mCherry*)** are regularly positioned along the length of the muscle cell whereas in reprogrammed muscle cells, nuceli aggregate either partially **(middle)** or completely **(right)** in the center of the cell (n=20/22 cells with nuclei displacement). **(B)** Bar graph displaying incidence of nuclear aggregation in *hsp:mCherry* positive muscle cells **(control; 0/19 cells with nuclear aggregation) and** reprogrammed *hsp:Oct4-mCherry-sox32* mucle cells **(2/22 no aggregation, 1/22 partial aggregation, 19/22 completely aggregated).**
