# Supplementary material for: Induced in vivo transdifferentiation of vertebrate muscle into early endoderm-like cells
Source: Research Square preprint supplement (doi:10.21203/rs.3.rs-90546/v1), 2020-10-26
Supplement: Supplementary file 9 [file e02b4f24477aa06ba80b5e01.docx]

**Supplement Figure 5: Reprogrammed muscle cells produce extensions and display dramatic changes to cell body morphology.**

**(A-A”)** Stills captured from live imaging movies of sox17:GFP transgenic zebrafish injected with *hsp:Oct4-P2A-mCherry-P2A-sox32* and imaged from 48-72hpf using light sheet confocal microscopy. **(A)** Reprogrammed cell **(yellow arrowhead)** residing in the head region, up regulates sox17:GFP **(green)** and produces a long cell extension over 20 hours **(A; single arrow, A”; double arrow, A”’; triple arrow). (B-B”’)** Liveconfocal imaging time course of a reprogrammed muscle cell that unregulated ptf1a:GFP **(green; B-B’”’)** andtracked over 5 days. During this time, cell morphology is radically altered as long extensions are extended from multiple locations along the main cell body. **(C)** 3D rendering of a 72hpf ptf1a:GFP transgenic zebrafish trunk injected with *hp:Oct4-P2A-mCherry-P2A-sox32*. Multiple cells with ectopic ptf1a:GFP **(green, arrows)** produce long projections and potentially contact other distant reprogrammed ptf1a:GFP expressing cells.
