# Supplementary material for: Induced in vivo transdifferentiation of vertebrate muscle into early endoderm-like cells
Source: Research Square preprint supplement (doi:10.21203/rs.3.rs-90546/v1), 2020-10-26
Supplement: Supplementary file 14 [file c105562d0bc640821a0a25d1.docx]

**Supplement Movie 2: A reprogrammed cell upregulates sox17:GFP, loses mCherry expression and displays dramatic changes in cell morphology.**

Higher magnification of Supplement Movie 1, focusing exclusively on Cell#2 (which is the same cell in Figure 1I), with individual color tracks split out. During this 16 hour window, this cell is expressing *Oct4-P2A-mCherry-sox32* (**red**) and eventually splits in two. Interestingly, it is not until after the cell splits that one part of the cell upregulates *sox17:GFP* (**green**).
